# Supplementary material
Source: PubMed Central journal article supplement (PMC4145116)
Supplement: supp_tpc.114.128603_tpc128603_SupplementalRev.pdf [file supp_tpc.114.128603_tpc128603_SupplementalRev.pdf]

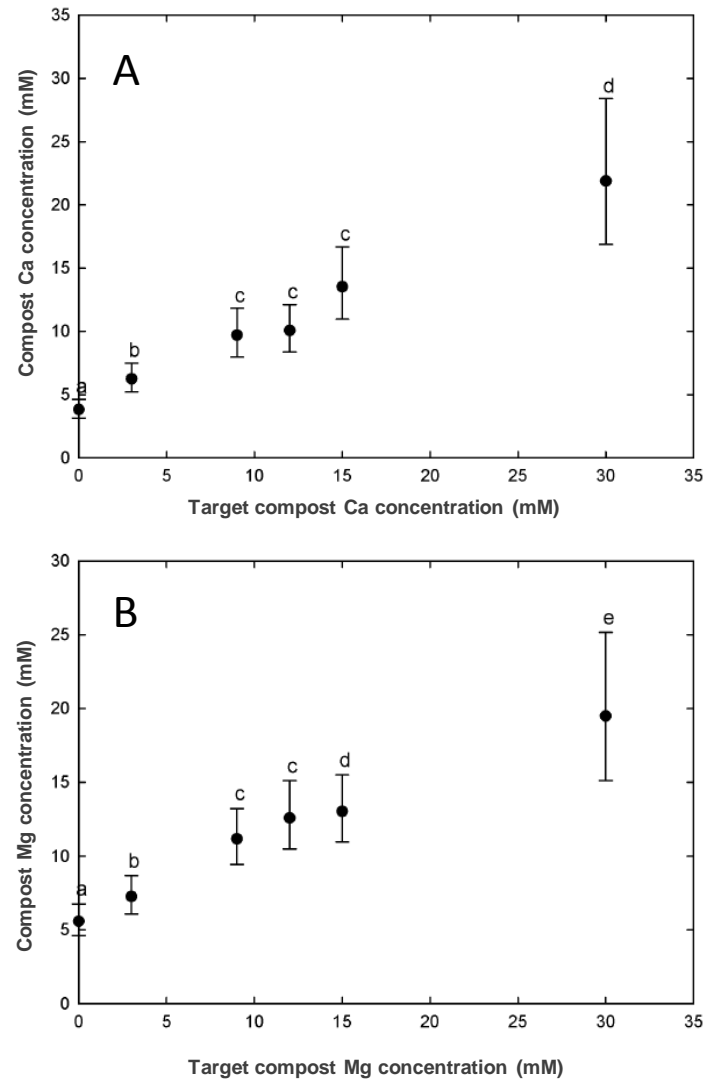

**Supplemental Figure 1.** Target and measured  $[Ca]_{ext}$  and  $[Mg]_{ext}$  in compost. Aqueous solutions of  $CaCl_2$  or  $MgCl_2$  were added to compost. Data are means  $\pm$  95% confidence interval ( $n=18$ ). Data sharing the same letter within a plot are statistically indistinguishable ( $P=0.05$ ).

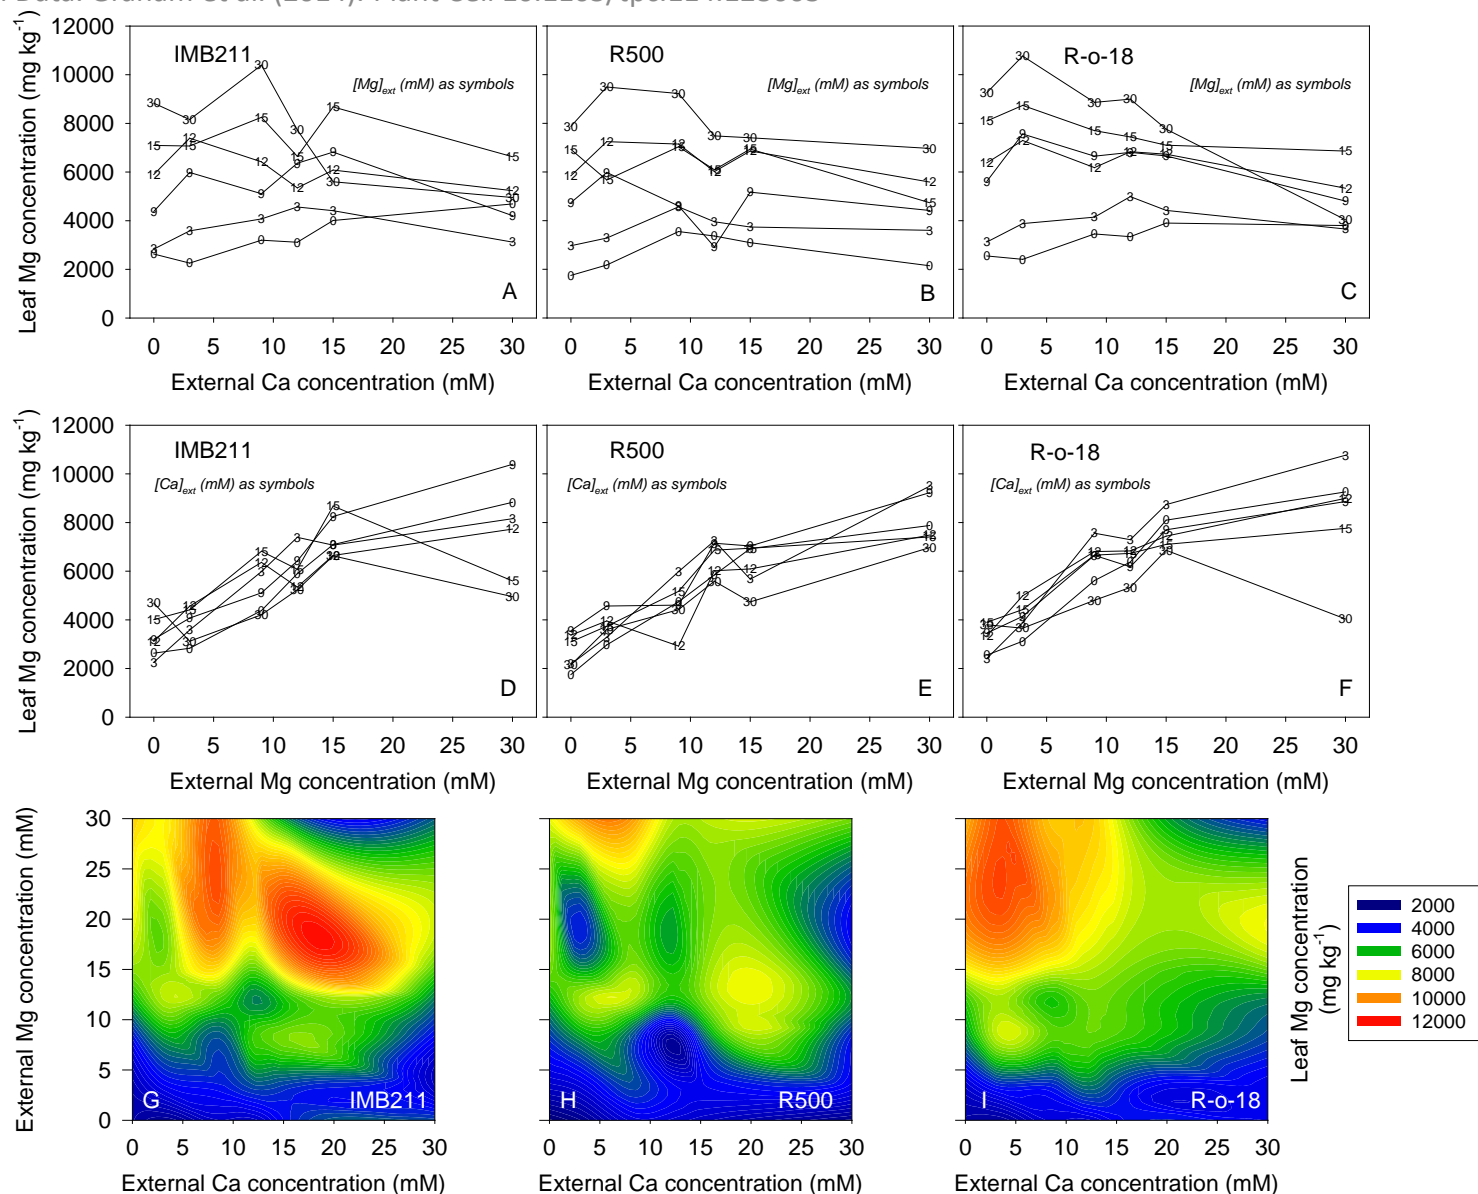

**Supplemental Figure 2.** Leaf Mg concentration of three genotypes of *Brassica rapa* (IMB211, R500, R-o-18) as functions of external CaCl<sub>2</sub> and MgCl<sub>2</sub> supply. Plants were grown in compost for 18 d. Data are means of 3 replicates analysed using a genotype/([Ca]<sub>ext</sub>\*[Mg]<sub>ext</sub>) treatment structure within an analysis of variance. In plots A-C, there are 6 [Mg]<sub>ext</sub> treatment levels per [Ca]<sub>ext</sub> treatment level; these are indicated as numerical symbols for each data point. Similarly, in plots D-F there are 6 [Ca]<sub>ext</sub> treatment levels per [Mg]<sub>ext</sub> treatment level. Plots G-I are ternary plots showing interpolated data for all 36 Ca\*Mg treatment combinations. Error terms (LSD<sub>P=0.05</sub>) are: 389, 953 and 2334 mg kg<sup>-1</sup> for genotype, [Ca]<sub>ext</sub> or [Mg]<sub>ext</sub>, and genotype/([Ca]<sub>ext</sub>\*[Mg]<sub>ext</sub>) terms, respectively.

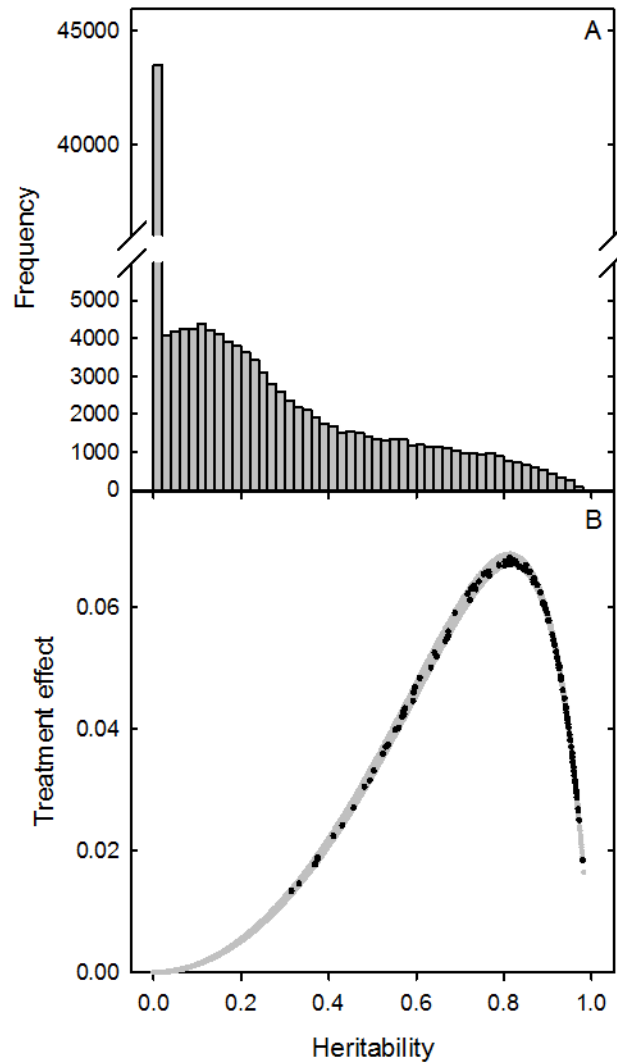

**Supplemental Figure 3.** Summary of heritability ( $H^2$ ) and treatment effect variance components for all 135k *Brassica* array probe sets. A, frequency distribution for the  $H^2$  of gene expression. B, treatment effect variance components as a function of  $H^2$ ; black circles are the 134 gene expression markers (GEMs) which were used to generate the linkage map for the BraIRRI mapping population.

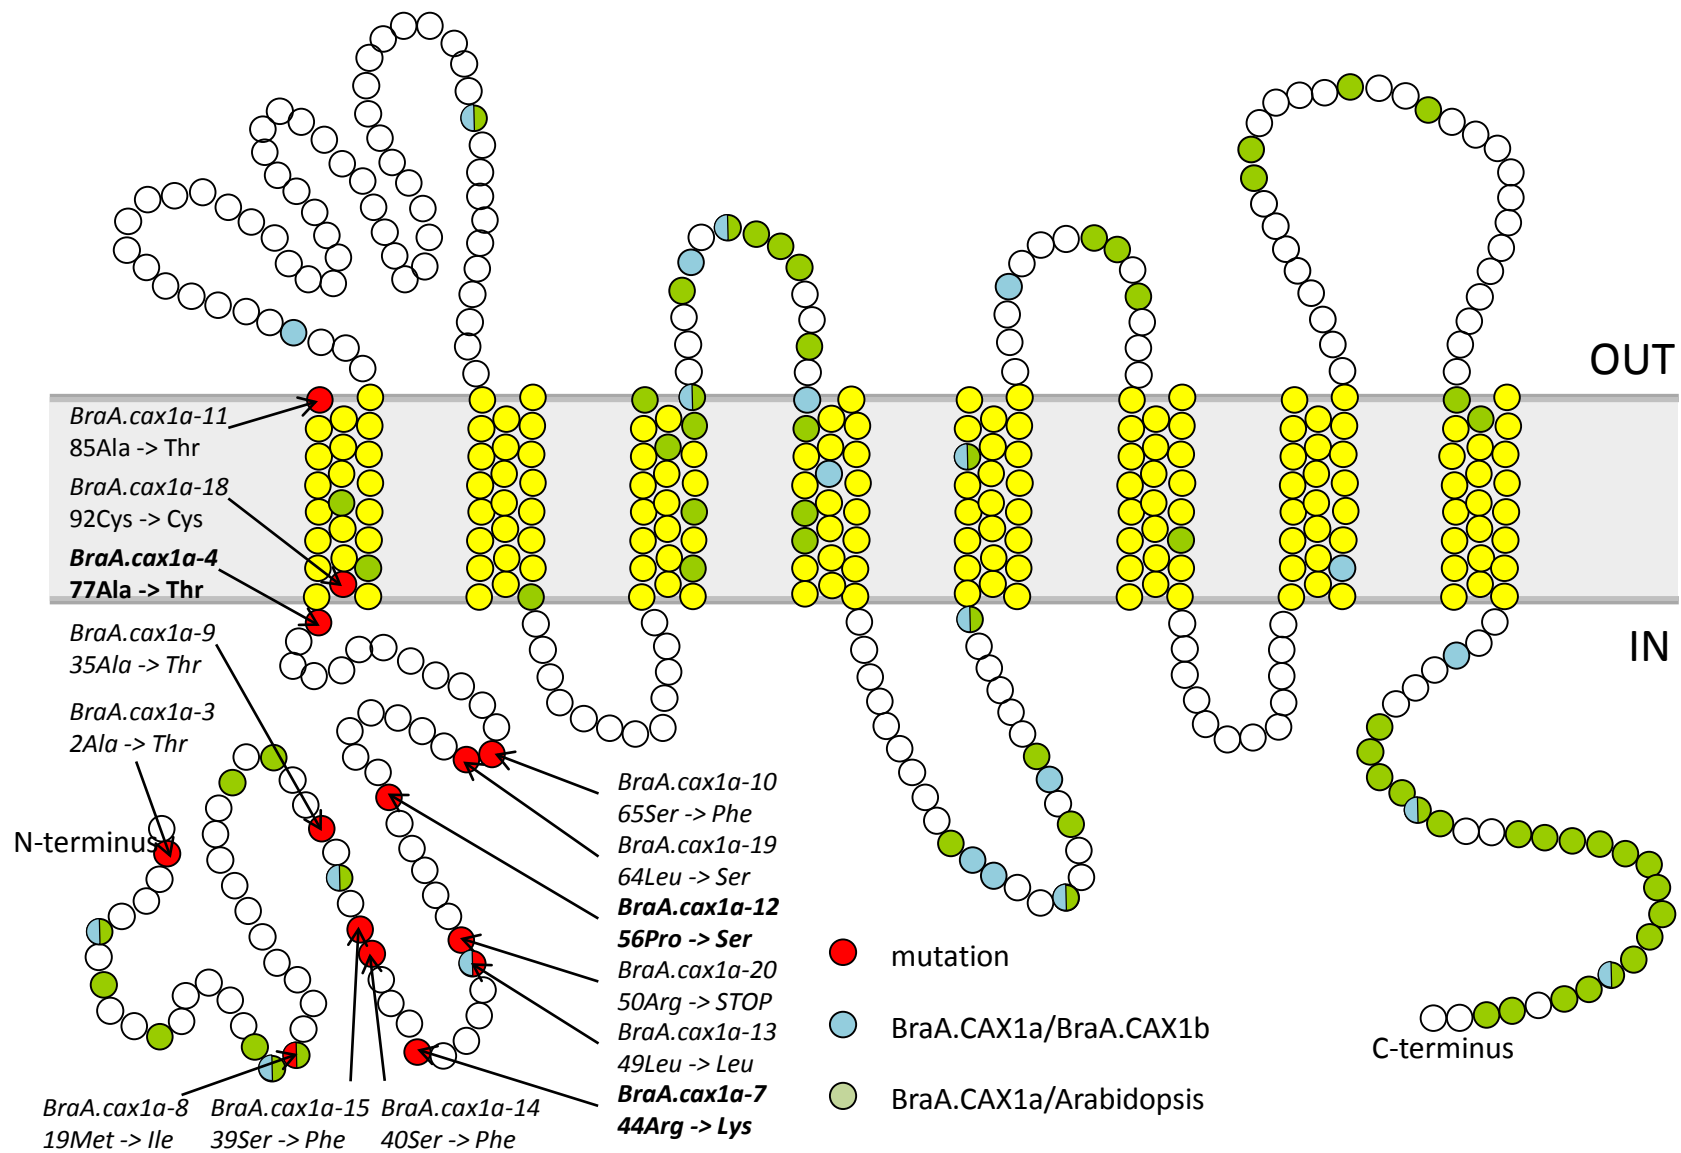

**Supplemental Figure 4.** Putative structure of BraA.CAX1a. Red circles, mutations for which M<sub>3</sub> seed were obtained. Green circles, amino acid differences between BraA.CAX1a and AtCAX1. Blue circles, amino acid differences between BraA.CAX1a and BraA.CAX1b. Yellow circles, amino acids within transmembrane domains, predicted using Krogh, A., Larsson B., von Hejine, G., Sonnhammer, E.L.L. (2001). Predicting transmembrane protein topology with a hidden Markov model: Application to complete genomes. *J. Mol. Biol.* **305**: 567-580.

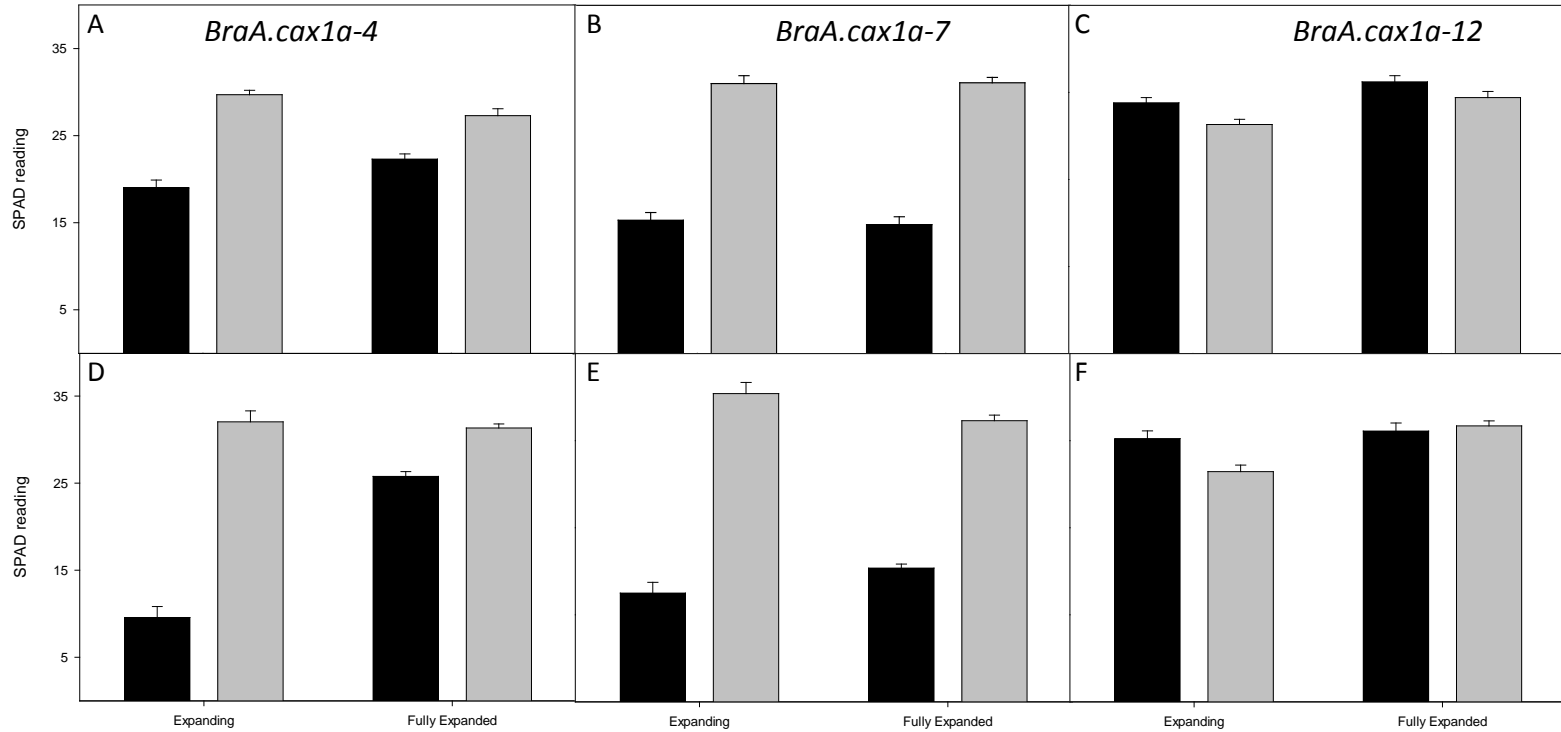

**Supplemental Figure 5.** Single-photon avalanche diode (SPAD) measurements of expanding and fully expanded leaves of three independent homozygous *BraA.cax1a* lines ( $BC_1S_2s$ , black bars), and their segregating wild-types (WT;  $BC_1S_2s$ , grey bars) grown in compost for 4 (A,B,C) or 5 (D,E,F) weeks.
